# Supplementary material for: The Cyclin Cln1 Controls Polyploid Titan Cell Formation following a Stress-Induced G2 Arrest in Cryptococcus
Source: PubMed Central journal article supplement (PMC8510536; doi:10.1128/mbio.02509-21), 2021-10-12
Supplement: mbio.02509-21-sf003.pdf [file mbio.02509-21-sf003.pdf]

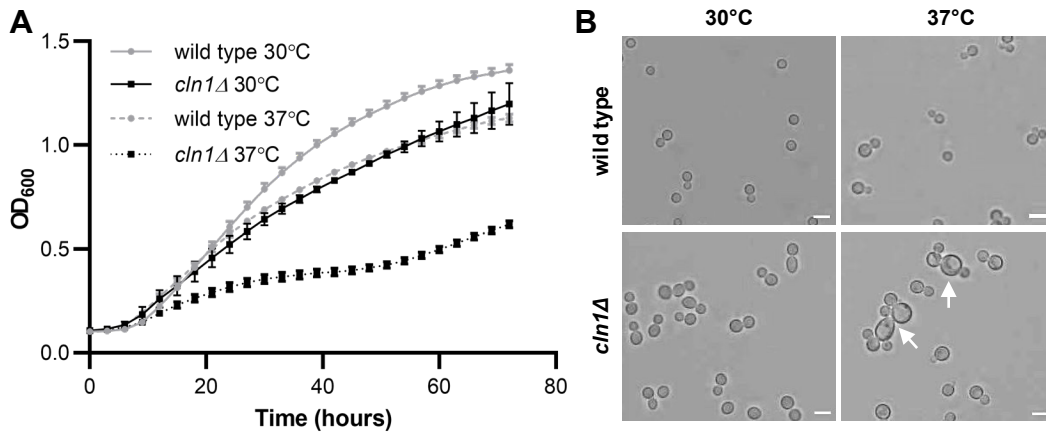

**Supplemental Figure SF3. The *cln1*Δ deletion has a growth defect at 37°C. A)** All strains were inoculated from a log phase overnight culture into 96-well plates, grown in a shaking spectrophotometer, and analyzed for growth based on optical density at 600 nm every 15 minutes. **B)** Cell morphology was analyzed microscopically after 24 hours growth at 30°C or 37°C. White arrows highlight the chains of cells that arose in the *cln1*Δ deletion strain at 37°C. Scale bar is 10 μm.
