# Supplementary material for: The Cyclin Cln1 Controls Polyploid Titan Cell Formation following a Stress-Induced G2 Arrest in Cryptococcus
Source: PubMed Central journal article supplement (PMC8510536; doi:10.1128/mbio.02509-21), 2021-10-12
Supplement: mbio.02509-21-st001.pdf [file mbio.02509-21-st001.pdf]

**Supplementary Table S1.** Diploid sporulation assay.

| Diploid Strain                              | Number of Spores Microdissected | Number of Colonies Obtained <sup>†</sup> | Number of Diploid Colonies with Drug Resistance to <i>NAT</i> + <i>NEO</i> | Number of Haploid Colonies with Drug Resistance ( <i>NAT/NEO</i> ) |
|---------------------------------------------|---------------------------------|------------------------------------------|----------------------------------------------------------------------------|--------------------------------------------------------------------|
| Wild type (neg control)                     | 100                             | 46                                       | 0                                                                          | 0                                                                  |
| <i>cln1</i> $\Delta$ ( <i>pos control</i> ) | 100                             | 61                                       | 1                                                                          | 30                                                                 |
| <i>clb2</i> $\Delta$ #1                     | 100                             | 18                                       | 0                                                                          | 0                                                                  |
| <i>ccl1</i> $\Delta$ #1                     | 100                             | 12                                       | 3                                                                          | 0                                                                  |
| <i>sgv1</i> $\Delta$ #1                     | 100                             | 13                                       | 2                                                                          | 0                                                                  |
| <i>kin28</i> $\Delta$ #1                    | 50                              | 11                                       | 1                                                                          | 0                                                                  |
| <i>cdc28</i> $\Delta$ #1                    | 150                             | 6                                        | 0                                                                          | 0                                                                  |
| <i>pho85</i> $\Delta$ #1                    | 150                             | 8                                        | 7                                                                          | 0                                                                  |

<sup>†</sup> Incomplete spore germination frequently occurs with *C. neoformans*; thus, the positive and negative control strains were also used to determine relative spore germination frequencies, which were approximately 50% for these experiments.
