# Supplementary material for: The Cyclin Cln1 Controls Polyploid Titan Cell Formation following a Stress-Induced G2 Arrest in Cryptococcus
Source: PubMed Central journal article supplement (PMC8510536; doi:10.1128/mbio.02509-21), 2021-10-12
Supplement: mbio.02509-21-st002.pdf [file mbio.02509-21-st002.pdf]

**Supplementary Table S2.** Strains used in this study.

| <b>Strain Name</b>            | <b>Genotype</b>                                                                            | <b>Source</b> |
|-------------------------------|--------------------------------------------------------------------------------------------|---------------|
| KN99 $\alpha$                 | MAT $\alpha$ wild type reference                                                           | (67)          |
| KN99a                         | MATa wild type reference                                                                   | (67)          |
| <i>cln1</i> $\Delta$          | MAT $\alpha$ <i>cln1</i> $\Delta$ ::NAT                                                    | This study    |
| <i>clb3</i> $\Delta$          | MAT $\alpha$ <i>clb3</i> $\Delta$ ::NAT                                                    | This study    |
| <i>pcl2</i> $\Delta$          | MAT $\alpha$ <i>pcl2</i> $\Delta$ ::NAT                                                    | This study    |
| <i>pcl9</i> $\Delta$          | MAT $\alpha$ <i>pcl9</i> $\Delta$ ::NAT                                                    | This study    |
| <i>pcl103</i> $\Delta$        | MAT $\alpha$ <i>pcl103</i> $\Delta$ ::NAT                                                  | This study    |
| <i>pcl5</i> $\Delta$          | MAT $\alpha$ <i>pcl5</i> $\Delta$ ::NAT                                                    | This study    |
| <i>pcl7</i> $\Delta$          | MAT $\alpha$ <i>pcl7</i> $\Delta$ ::NAT                                                    | This study    |
| <i>pho80</i> $\Delta$         | MAT $\alpha$ <i>pho80</i> $\Delta$ ::NAT                                                   | This study    |
| <i>clg1</i> $\Delta$          | MAT $\alpha$ <i>clg1</i> $\Delta$ ::NAT                                                    | This study    |
| <i>ssn801</i> $\Delta$        | MAT $\alpha$ <i>ssn801</i> $\Delta$ ::NAT                                                  | This study    |
| <i>ssn802</i> $\Delta$        | MAT $\alpha$ <i>ssn802</i> $\Delta$ ::NAT                                                  | This study    |
| <i>ssn803</i> $\Delta$        | MAT $\alpha$ <i>ssn803</i> $\Delta$ ::NAT                                                  | This study    |
| Diploid <i>cln1</i> $\Delta$  | Diploid, <i>CLN1/cln1</i> $\Delta$ ::NAT<br><i>NOP1-mCherry</i> ::NEO 14-3-3-GFP::HYG      | This study    |
| Diploid <i>clb2</i> $\Delta$  | Diploid, <i>CLB2/clb2</i> $\Delta$ ::NAT<br><i>NOP1-mCherry</i> ::NEO 14-3-3-GFP::HYG      | This study    |
| Diploid <i>ccl1</i> $\Delta$  | Diploid, <i>CCL1/ccl1</i> $\Delta$ ::NAT<br><i>NOP1-mCherry</i> ::NEO 14-3-3-GFP::HYG      | This study    |
| <i>ctk1</i> $\Delta$          | MAT $\alpha$ <i>ctk1</i> $\Delta$ ::NEO                                                    | This study    |
| <i>cdc2801</i> $\Delta$       | MAT $\alpha$ <i>cdc2801</i> $\Delta$ ::NEO                                                 | This study    |
| <i>cdk8</i> $\Delta$          | MAT $\alpha$ <i>cdk8</i> $\Delta$ ::NEO                                                    | This study    |
| Diploid <i>cdk1</i> $\Delta$  | Diploid, <i>CDK1/cdk</i> $\Delta$ ::NEO<br><i>NOP1-mCherry</i> ::NAT 14-3-3-GFP::HYG       | This study    |
| Diploid <i>sgv1</i> $\Delta$  | Diploid, <i>SGV1/sgv1</i> $\Delta$ ::NEO<br><i>NOP1-mCherry</i> ::NAT 14-3-3-GFP::HYG      | This study    |
| Diploid <i>kin28</i> $\Delta$ | Diploid,<br><i>KIN28/kin28</i> $\Delta$ ::NEO<br><i>NOP1-mCherry</i> ::NAT 14-3-3-GFP::HYG | This study    |
| Diploid <i>pho85</i> $\Delta$ | Diploid,<br><i>PHO85/pho85</i> $\Delta$ ::NEO<br><i>NOP1-mCherry</i> ::NAT 14-3-3-GFP::HYG | This study    |

|                                       |                                                                                                                         |                                             |
|---------------------------------------|-------------------------------------------------------------------------------------------------------------------------|---------------------------------------------|
| Diploid KN99α/KN99a                   | Diploid, MATα <i>NOP1-mCherry::NEO</i> MATα <i>14-3-3-GFP::HYG</i>                                                      | This study                                  |
| <i>P<sub>GPD1</sub>-CLN1</i>          | MATα <i>P<sub>GPD1</sub>-CLN1::NAT</i>                                                                                  | This study                                  |
| <i>P<sub>CTR4</sub>-CLN1</i>          | MATα, <i>P<sub>CTR4</sub>-CLN1::NAT</i>                                                                                 | This study                                  |
| <i>cln1Δ::CLN1</i>                    | MATα <i>CLN1::NEO</i>                                                                                                   | This study                                  |
| <i>clb3Δ::CLB3</i>                    | MATα <i>CLB3::NEO</i>                                                                                                   | This study                                  |
| <i>pho80Δ::PHO80</i>                  | MATα <i>PHO80::NEO</i>                                                                                                  | This study                                  |
| <i>ssn801Δ::SSN801</i>                | MATα <i>SSN801::NEO</i>                                                                                                 | This study                                  |
| <i>ssn803Δ::SSN803</i>                | MATα <i>SSN803::NEO</i>                                                                                                 | This study                                  |
| <i>ctk1Δ::CTK1</i>                    | MATα <i>CTK1::HYG</i>                                                                                                   | This study                                  |
| <i>cdk8Δ::CDK8</i>                    | MATα <i>CDK8::HYG</i>                                                                                                   | This Study                                  |
| CNV111                                | MATα <i>GFP-NDC1::NAT</i> + <i>mCherry-CSE4::NEO</i>                                                                    | (25)                                        |
| CWY364                                | MATα <i>cln1Δcln2Δcln3Δleu::GAL-CLN3::ade1 his2 trp1-1 ura3 Δns bar1Δ</i>                                               | This study; a gift from Dr. Curt Wittenberg |
| YS108                                 | MATα <i>GAL1::CLB1 (LEU2) clb1::URA3 clb2::LEU2 clb3::TRP1 clb4::HIS2 ade1</i>                                          | (42)                                        |
| K3418F                                | MATα <i>ade2-1can1-100 his3-11,15 leu2 trp1-1 ura3-1 clb3Δ::TRP1 clb4Δ::HIS3 clb5Δ::hisG clb6Δ::LEU2 TRP1::GAL-CLB5</i> | This study; a gift from Dr. David T. Stuart |
| <i>Nop1-mCherry + TUB1-GFP</i>        | <i>NOP1-mCherry::NEO + TUB1-GFP::NAT</i>                                                                                | This study                                  |
| CWY364 + <i>P<sub>GPD1</sub>-CLN1</i> | CWY364 + <i>P<sub>GPD1</sub>-CLN1::URA3</i>                                                                             | This study                                  |
| YS108 + <i>P<sub>GPD1</sub>-CLN1</i>  | YS108 + <i>P<sub>GPD1</sub>-CLN1::ADE1</i>                                                                              | This study                                  |
| K3418F + <i>P<sub>GPD1</sub>-CLN1</i> | K3418F + <i>P<sub>GPD1</sub>-CLN1::URA3</i>                                                                             | This study                                  |
| <i>CLN1-His<sub>6</sub></i>           | MATα <i>CLN1-His<sub>6</sub>::NEO</i>                                                                                   | This study                                  |
| <i>CDK1-Myc</i>                       | MATα <i>CDK1-Myc::NAT</i>                                                                                               | This study                                  |
| <i>CLN1-His + CDK1-Myc</i>            | MATα <i>CLN1-His::NEO + CDK1-Myc::NAT</i>                                                                               | This study                                  |
| <i>14-3-3-GFP</i>                     | MATα <i>14-3-3-GFP::HYG</i>                                                                                             | This study                                  |
