# Supplementary material for: The Cyclin Cln1 Controls Polyploid Titan Cell Formation following a Stress-Induced G2 Arrest in Cryptococcus
Source: PubMed Central journal article supplement (PMC8510536; doi:10.1128/mbio.02509-21), 2021-10-12
Supplement: mbio.02509-21-st003.pdf [file mbio.02509-21-st003.pdf]

**Supplementary Table S3.** Primers used in this study.

| Strain Name     | Description                                | Primer Name | Sequence                                         |
|-----------------|--------------------------------------------|-------------|--------------------------------------------------|
| <i>clg1</i> Δ   | CNAG_00024 left arm forward                | KN0555      | GACGCACGCCACATCTCATA                             |
|                 | CNAG_00024 left arm reverse                | KN0556      | TCTCCAGCTCACATCCTCGGATGTCGGAAGAGGGTG AAA         |
|                 | NAT for CNAG_00024 forward                 | KN0557      | TTTCACCCTCTTCCGACATCCGAGGATGTGAGCTGG AGA         |
|                 | NAT for CNAG_00024 reverse                 | KN0558      | GTGGATGGAAGGTGGTTGTGGAAGAGATGTAGAAAC TAGCTTCCTGG |
|                 | CNAG_00024 right arm forward               | KN0559      | CCAGGAAGCTAGTTTCTACATCTCTTCCACAACCACC TTCCATCCAC |
|                 | CNAG_00024 right arm reverse               | KN0560      | AGTCATCCTCGTCCTTGCTC                             |
|                 | CNAG_00024+ NAT+CNAG_00024 Testing forward | KN0561      | CGGTCCACTACCAACTCTTA                             |
|                 | CNAG_00024+ NAT+CNAG_00024 Testing reverse | KN0562      | TCATCGCTGTATCGTTCTGG                             |
| <i>pcl2</i> Δ   | CNAG_00183 left arm forward                | KN0567      | CGTCGTGAAGTTAGTGGAGCC                            |
|                 | CNAG_00183 left arm reverse                | KN0568      | TCTCCAGCTCACATCCTCGGTTGGTCGTGTATATCAG CCG        |
|                 | NAT for CNAG_00183 forward                 | KN0569      | CGGCTGATATACACGACCAACCGAGGATGTGAGCTG GAGA        |
|                 | NAT for CNAG_00183 reverse                 | KN0570      | CGTGAGAAAATGCCAGGGTAGAAGAGATGTAGAAAC TAGCTTCCTGG |
|                 | CNAG_00183 right arm forward               | KN0571      | CCAGGAAGCTAGTTTCTACATCTCTTCTACCCTGGCA TTTTCTCACG |
|                 | CNAG_00183 right arm reverse               | KN0572      | AACACCGAGCGTCCCGAATG                             |
|                 | CNAG_00183+ NAT+CNAG_00183 Testing forward | KN0573      | CGTCGTGAAGTTAGTGGAGC                             |
|                 | CNAG_00183+ NAT+CNAG_00183 Testing reverse | KN0574      | ACACGCCAGCAGGGTTTCCA                             |
| <i>ssn801</i> Δ | CNAG_00440 left arm forward                | KN0575      | CGCATAAACACTCACAGAACCG                           |
|                 | CNAG_00440 left arm reverse                | KN0576      | TCTCCAGCTCACATCCTCGCTAACTGCAGCTTTTATT GGTGTGT    |
|                 | NAT for CNAG_00440 forward                 | KN0577      | ACACACCAATAAAAGCTGCAGTTAGCGAGGATGTGA GCTGGAGA    |

|                |                                                      |        |                                                     |
|----------------|------------------------------------------------------|--------|-----------------------------------------------------|
|                | NAT for<br>CNAG_00440<br>reverse                     | KN0578 | TGACCTATGCTATCTTGCCCGAAGAGATGTAGAACT<br>AGCTTCCTGG  |
|                | CNAG_00440<br>right arm forward                      | KN0579 | CCAGGAAGCTAGTTTCTACATCTCTTCGGGCAAGATA<br>GCATAGGTCA |
|                | CNAG_00440<br>right arm reverse                      | KN0580 | CGATGGCTTGAGGATTGGTA                                |
|                | CNAG_00440+<br>NAT+CNAG_004<br>40 Testing<br>forward | KN0581 | TGTCAGAATGAGTGGCGTAG                                |
|                | CNAG_00440+<br>NAT+CNAG_004<br>40 Testing<br>reverse | KN0582 | GCCATCTCGTCTCCCTTGTC                                |
| <i>pho80</i> Δ | CNAG_01922 left<br>arm forward                       | KN0583 | CTGGAATACTGTAGCATCACCTGTC                           |
|                | CNAG_01922 left<br>arm reverse                       | KN0584 | TCTCCAGCTCACATCCTCGGGTGGCTATGGCGTGCT<br>TG          |
|                | NAT for<br>CNAG_01922<br>forward                     | KN0585 | CAAGCACGCCATAGCCACCCGAGGATGTGAGCTGG<br>AGA          |
|                | NAT for<br>CNAG_01922<br>reverse                     | KN0586 | GAATGGAGATACGGCAGGATGAAGAGATGTAGAAAC<br>TAGCTTCCTGG |
|                | CNAG_01922<br>right arm forward                      | KN0587 | CCAGGAAGCTAGTTTCTACATCTCTTCATCCTGCCGT<br>ATCTCCATTC |
|                | CNAG_01922<br>right arm reverse                      | KN0588 | AGCGCTCGCCTTGTGAACTA                                |
|                | CNAG_01922+<br>NAT+CNAG_019<br>22 Testing<br>forward | KN0589 | CGAAGGGGAATGCTGGACG                                 |
|                | CNAG_01922+<br>NAT+CNAG_019<br>22 Testing<br>reverse | KN0590 | CACACCGCCCCAATAGACAAG                               |
| <i>clb3</i> Δ  | CNAG_02095 left<br>arm forward                       | KN0591 | AATCCGTGAAGGGAATGTGG                                |
|                | CNAG_02095 left<br>arm reverse                       | KN0592 | TCTCCAGCTCACATCCTCGGGTTCGCAGATACTTAC<br>TCG         |
|                | NAT for<br>CNAG_02095<br>forward                     | KN0593 | CGAGTAAGTATCTGCGACCCCGAGGATGTGAGCTGG<br>AGA         |
|                | NAT for<br>CNAG_02095<br>reverse                     | KN0594 | TACAGCCCAAGGTTAGCCCAGAAGAGATGTAGAAAC<br>TAGCTTCCTGG |
|                | CNAG_02095<br>right arm forward                      | KN0595 | CCAGGAAGCTAGTTTCTACATCTCTTCTGGGCTAACC<br>TTGGGCTGTA |
|                | CNAG_02095<br>right arm reverse                      | KN0596 | TTACCTGCGATGACCTTTGG                                |
|                | CNAG_02095+<br>NAT+CNAG_020<br>95 Testing<br>forward | KN0597 | CGAATGAGATACAGGGTTGC                                |

|                                                      |                                                      |                                |                                                          |
|------------------------------------------------------|------------------------------------------------------|--------------------------------|----------------------------------------------------------|
|                                                      | CNAG_02095+<br>NAT+CNAG_020<br>95 Testing<br>reverse | KN0598                         | CAGTTCCTCCAATACCTCCT                                     |
| <i>ssn802Δ</i>                                       | CNAG_02127 left<br>arm forward                       | KN0599                         | TAAAGAGGATTGGACTCGTG                                     |
|                                                      | CNAG_02127 left<br>arm reverse                       | KN0600                         | TCTCCAGCTCACATCCTCGGCTGCTGTATATCCAGG<br>CCCT             |
|                                                      | NAT for<br>CNAG_02127<br>forward                     | KN0601                         | AGGGCCTGGATATACAGCAGCCGAGGATGTGAGCT<br>GGAGA             |
|                                                      | NAT for<br>CNAG_02127<br>reverse                     | KN0602                         | ACATAGAAGACACAGAAATACCAACGAAGAGATGTA<br>GAACTAGCTTCCTGG  |
|                                                      | CNAG_02127<br>right arm forward                      | KN0603                         | CCAGGAAGCTAGTTTCTACATCTCTTCGTTGGTATTT<br>CTGTGTCTTCTATGT |
|                                                      | CNAG_02127<br>right arm reverse                      | KN0604                         | GCCCGACGCAGGTGTTTGT                                      |
|                                                      | CNAG_02127+<br>NAT+CNAG_021<br>27 Testing<br>forward | KN0605                         | TCTCCTCCTGTTGCTTGGTG                                     |
|                                                      | CNAG_02127+<br>NAT+CNAG_021<br>27 Testing<br>reverse | KN0606                         | CTCCTCCCGAAGGTTACTCC                                     |
|                                                      | <i>pcl5Δ</i>                                         | CNAG_02658 left<br>arm forward | KN0607                                                   |
| CNAG_02658 left<br>arm reverse                       |                                                      | KN0608                         | TCTCCAGCTCACATCCTCGCCCCGTCTAATCAAACCC                    |
| NAT for<br>CNAG_02658<br>forward                     |                                                      | KN0609                         | GGGTTTGATTAGACGGGGCGAGGATGTGAGCTGGA<br>GA                |
| NAT for<br>CNAG_02658<br>reverse                     |                                                      | KN0610                         | ACGATGTTGGAGGATGGAGGGAAGAGATGTAGAAAC<br>TAGCTTCCTGG      |
| CNAG_02658<br>right arm forward                      |                                                      | KN0611                         | CCAGGAAGCTAGTTTCTACATCTCTTCCCTCCATCCT<br>CCAACATCGT      |
| CNAG_02658<br>right arm reverse                      |                                                      | KN0612                         | CTTCACCTTACCTATCCTCC                                     |
| CNAG_02658+<br>NAT+CNAG_026<br>58 Testing<br>forward |                                                      | KN0613                         | CGAGCCGATAATACTACGCC                                     |
| CNAG_02658+<br>NAT+CNAG_026<br>58 Testing<br>reverse |                                                      | KN0614                         | TATGCCCAGGACACCGTAGA                                     |
| <i>pcl103Δ</i>                                       |                                                      | CNAG_03385 left<br>arm forward | KN0615                                                   |
|                                                      | CNAG_03385 left<br>arm reverse                       | KN0616                         | TCTCCAGCTCACATCCTCGTCGGGAGAACGACAGAA<br>TGGTA            |
|                                                      | NAT for<br>CNAG_03385<br>forward                     | KN0617                         | TACCATTCTGTCGTTCTCCCGACGAGGATGTGAGCT<br>GGAGA            |

|                          |                                                   |        |                                                     |
|--------------------------|---------------------------------------------------|--------|-----------------------------------------------------|
|                          | NAT for<br>CNAG_03385<br>reverse                  | KN0618 | CGGTAGGAGCGACTTTGGATGAAGAGATGTAGAAAC<br>TAGCTTCCTGG |
|                          | CNAG_03385<br>right arm forward                   | KN0619 | CCAGGAAGCTAGTTTCTACATCTCTTCATCCAAAGTC<br>GCTCCTACCG |
|                          | CNAG_03385<br>right arm reverse                   | KN0620 | TACTGAGCCTCCGACCAAAT                                |
|                          | CNAG_03385+N<br>AT+CNAG_03385<br>Testing forward  | KN0621 | GAACGGTCCGTTACGGTGGA                                |
|                          | CNAG_03385+N<br>AT+CNAG_03385<br>Testing reverse  | KN0622 | TAGCAGACCATCGGCTTTGA                                |
| Diploid<br><i>ccl1</i> Δ | CNAG_04405 left<br>arm forward                    | KN0623 | CTGGGCTACAATGGACAAGA                                |
|                          | CNAG_04405 left<br>arm reverse                    | KN0624 | TCTCCAGCTCACATCCTCGTGAGTGCTGAGACGGAG<br>AAA         |
|                          | NAT for<br>CNAG_04405<br>forward                  | KN0625 | TTTCTCCGTCTCAGCACTCACGAGGATGTGAGCTGG<br>AGA         |
|                          | NAT for<br>CNAG_04405<br>reverse                  | KN0626 | CTTTAGCCGCTGCGTCTGGAAGAGATGTAGAACTA<br>GCTTCCTGG    |
|                          | CNAG_04405<br>right arm forward                   | KN0627 | CCAGGAAGCTAGTTTCTACATCTCTTCCAGACGCAG<br>CGGCTAAAG   |
|                          | CNAG_04405<br>right arm reverse                   | KN0628 | AAGCCCACCATCGTCTGA                                  |
|                          | CNAG_04405+N<br>NAT+CNAG_044<br>05 Testig forward | KN0629 | GTCGTGCCTCGGGATAATGA                                |
|                          | CNAG_04405+N<br>NAT+CNAG_044<br>05 Testig reverse | KN0630 | ACGCACCTATTCGTGACAGA                                |
| Diploid<br><i>clb2</i> Δ | CNAG_04575 left<br>arm forward                    | KN0631 | GGGTAGAAAGTTGTCAGGTGGG                              |
|                          | CNAG_04575 left<br>arm reverse                    | KN0632 | TCTCCAGCTCACATCCTCGTAAATGTCAGCTTGAGTT<br>TAGATGT    |
|                          | NAT for<br>CNAG_04575<br>forward                  | KN0633 | ACATCTAAACTCAAGCTGACATTTACGAGGATGTGAG<br>CTGGAGA    |
|                          | NAT for<br>CNAG_04575<br>reverse                  | KN0634 | CAAGCGCTCCTTGTCGCATGAAGAGATGTAGAACT<br>AGCTTCCTGG   |
|                          | CNAG_04575<br>right arm forward                   | KN0635 | CCAGGAAGCTAGTTTCTACATCTCTTCATGCGACAAG<br>GAGCGCTTG  |
|                          | CNAG_04575<br>right arm reverse                   | KN0636 | CTCTACCCATTTATCCTGGTCTCA                            |
|                          | CNAG_04575+N<br>NAT+CNAG_045<br>75 Teting forward | KN0637 | CAGCACGCAGTCTCGTAAGT                                |
|                          | CNAG_04575+N<br>NAT+CNAG_045<br>75 Teting reverse | KN0638 | GGGTGGGAAGAAGGTTTGAG                                |
| <i>pcl7</i> Δ            | CNAG_05524 left<br>arm forward                    | KN0639 | TGTGGTAGTTTCGGACATAGTTCAT                           |

|                |                                            |        |                                                   |
|----------------|--------------------------------------------|--------|---------------------------------------------------|
|                | CNAG_05524 left arm reverse                | KN0640 | TCTCCAGCTCACATCCTCGCGAATGGTATATCAAGGTCTGTGG       |
|                | NAT for CNAG_05524 forward                 | KN0641 | CCACAGACCTTGATATACCATTTCGCGAGGATGTGAGCTGGAGA      |
|                | NAT for CNAG_05524 reverse                 | KN0642 | AACCCAGCAAGCACTTTTCAGGAAGAGATGTAGAAAC TAGCTTCCTGG |
|                | CNAG_05524 right arm forward               | KN0643 | CCAGGAAGCTAGTTTCTACATCTCTTCTGAAAGTGC TTGCTGGGTT   |
|                | CNAG_05524 right arm reverse               | KN0644 | GAAGGGCTCAAGGCATACTA                              |
|                | CNAG_05524+N AT+CNAG_05524 Testing forward | KN0645 | GCAGCATTTCGCTCTGTTGGT                             |
|                | CNAG_05524+N AT+CNAG_05524 Testing reverse | KN0646 | ATCCTCCTGCGTGATGCCTA                              |
| <i>ssn803Δ</i> | CNAG_05901 left arm forward                | KN0647 | GGAGGTAACCCTTGATGTGG                              |
|                | CNAG_05901 left arm reverse                | KN0648 | TCTCCAGCTCACATCCTCGGTAGAAGCCCTATGGGAGAT           |
|                | NAT for CNAG_05901 forward                 | KN0649 | ATCTCCCATAGGGCTTCTACCGAGGATGTGAGCTGGAGA           |
|                | NAT for CNAG_05901 reverse                 | KN0650 | GGGTGTCAGAAGTCTCAGCAGAAGAGATGTAGAAAC TAGCTTCCTGG  |
|                | CNAG_05901 right arm forward               | KN0651 | CCAGGAAGCTAGTTTCTACATCTCTTCTGCTGAGACT TCTGACACCC  |
|                | CNAG_05901 right arm reverse               | KN0652 | ACTCGTCCAACAATCGCTCA                              |
|                | CNAG_05901+N AT+CNAG_05901 forward         | KN0653 | GCCTCACCAACAGTCTTCTT                              |
|                | CNAG_05901+N AT+CNAG_05901 reverse         | KN0654 | GTGACCACGAAGAAAACAGG                              |
| <i>cln1Δ</i>   | CNAG_06092 left arm forward                | KN0655 | GCTTTACGATTAGTTCTGGCTTCTG                         |
|                | CNAG_06092 left arm reverse                | KN0656 | TCTCCAGCTCACATCCTCGTTTGGGTGGACTTTTCGCA GG         |
|                | NAT for CNAG_06092 forward                 | KN0657 | CCTGCGAAAGTCCACCCAAACGAGGATGTGAGCTGGAGA           |
|                | NAT for CNAG_06092 reverse                 | KN0658 | GGAATAACCTTAGCCATCGGGAAGAGATGTAGAAAC TAGCTTCCTGG  |
|                | CNAG_06092 right arm forward               | KN0659 | CCAGGAAGCTAGTTTCTACATCTCTTCCCGATGGCTA AGGTTATTCC  |
|                | CNAG_06092 right arm reverse               | KN0660 | CGGGCGAAGAACGAAGAAGA                              |
|                | CNAG_06092+N AT+CNAG_06092 Testing forward | KN0661 | GGACGGGATGGAGAATGAGG                              |

|                                                   |                                                  |                                |                                                     |
|---------------------------------------------------|--------------------------------------------------|--------------------------------|-----------------------------------------------------|
|                                                   | CNAG_06092+N<br>AT+CNAG_06092<br>Testing reverse | KN0662                         | GTTATGGGTTGAGAAGGGTG                                |
| <i>pci9Δ</i>                                      | CNAG_00442 left<br>arm forward                   | KN0663                         | GTGGGACTCTTTCACTTGCTCT                              |
|                                                   | CNAG_00442 left<br>arm reverse                   | KN0664                         | TCTCCAGCTCACATCCTCGAGTTGAGTCGCAATGATT<br>GTCGGTA    |
|                                                   | NAT for<br>CNAG_00442<br>forward                 | KN0665                         | TACCGACAATCATTGCGACTCAACTCGAGGATGTGA<br>GCTGGAGA    |
|                                                   | NAT for<br>CNAG_00442<br>reverse                 | KN0666                         | GTCCTCCCAGCCCTCTTGAAGAAGAGATGTAGAAAC<br>TAGCTTCCTGG |
|                                                   | CNAG_00442<br>right arm forward                  | KN0667                         | CCAGGAAGCTAGTTTCTACATCTCTTCTTCAAGAGGG<br>CTGGGAGGAC |
|                                                   | CNAG_00442<br>right arm reverse                  | KN0668                         | GTCCATACGAGGTGTCAGCA                                |
|                                                   | CNAG_00442+N<br>AT+CNAG_00442<br>Testing forward | KN0669                         | AGCCCGAGTCAGAAGTCAAC                                |
|                                                   | CNAG_00442+N<br>AT+CNAG_00442<br>Testing reverse | KN0670                         | GTATCTTCCGTGACCTGCT                                 |
|                                                   | <i>cdc2801Δ</i>                                  | CNAG_00415 left<br>arm forward | KN0671                                              |
| CNAG_00415 left<br>arm reverse                    |                                                  | KN0672                         | TCTCCAGCTCACATCCTCGCTGGGTGTGTTTGACTG<br>AAATATG     |
| NEO for<br>CNAG_00415<br>forward                  |                                                  | KN0673                         | CATATTTCAAGTCAAACACACCCAGCGAGGATGTGAG<br>CTGGAGA    |
| NEO for<br>CNAG_00415<br>reverse                  |                                                  | KN0674                         | AGAACGCACGAGAAGTATGGGGTTTATCTGTATTAAC<br>ACGG       |
| CNAG_00415<br>right arm forward                   |                                                  | KN0675                         | CCGTGTTAATACAGATAAACCCATACTTCTCGTGCG<br>TTCT        |
| CNAG_00415<br>right arm reverse                   |                                                  | KN0676                         | GTTCTCTGACGCTTCTATC                                 |
| CNAG_00415+N<br>EO+CNAG_0041<br>5 Testing forward |                                                  | KN0677                         | GCCTCCGTCAACATTCGCTAT                               |
| CNAG_00415+N<br>EO+CNAG_0041<br>5 Testing reverse |                                                  | KN0678                         | TACATCGGGGTGCTGTCAAT                                |
| Diploid<br><i>sgv1Δ</i>                           |                                                  | CNAG_05549 left<br>arm forward | KN0733                                              |
|                                                   | CNAG_05549 left<br>arm reverse                   | KN0734                         | TCTCCAGCTCACATCCTCGAACTGGGTAAGTCCGCA<br>ATGGT       |
|                                                   | NEO for<br>CNAG_05549<br>forward                 | KN0735                         | ACCATTGCGGACTTACCCAGTTCGAGGATGTGAGCT<br>GGAGA       |
|                                                   | NEO for<br>CNAG_05549<br>reverse                 | KN0736                         | CCTACTCGGCGATTCCATCAATGGTTTATCTGTATTA<br>ACACGG     |
|                                                   | CNAG_05549<br>right arm forward                  | KN0737                         | CCGTGTTAATACAGATAAACCATTGATGGAATCGCCG<br>AGTAGG     |

|                         |                                                   |        |                                                   |
|-------------------------|---------------------------------------------------|--------|---------------------------------------------------|
|                         | CNAG_05549<br>right arm reverse                   | KN0738 | TGAAACGAGGGAGTGATAAGGATT                          |
|                         | CNAG_05549+N<br>EO+CNAG_0554<br>9 Testing forward | KN0739 | TCGCCCATACCTTCTTACTCTC                            |
|                         | CNAG_05549+N<br>EO+CNAG_0554<br>9 Testing reverse | KN0740 | GGAGACGGAGTCGGTTTCAG                              |
| Diploid<br><i>cdk1Δ</i> | CNAG_01664 left<br>arm forward                    | KN0687 | GCGTCGTAGTGGGTGTAGATG                             |
|                         | CNAG_01664 left<br>arm reverse                    | KN0688 | TCTCCAGCTCACATCCTCGGGTGTTCGATCGTGG                |
|                         | NEO for<br>CNAG_01664<br>forward                  | KN0689 | CCCACGATCGAAAAACACCCGAGGATGTGAGCTGG<br>AGA        |
|                         | NEO for<br>CNAG_01664<br>reverse                  | KN0690 | GTAGGCTTGTAAATCGGGCAAGGTTTATCTGTATTAAC<br>ACGG    |
|                         | CNAG_01664<br>right arm forward                   | KN0691 | CCGTGTTAATACAGATAAACCTTGCCCGATTACAAGC<br>CTAC     |
|                         | CNAG_01664<br>right arm reverse                   | KN0692 | TGGGGAAGGACAGTTTGAAGAG                            |
|                         | CNAG_01664+N<br>EO+CNAG_0166<br>4 Testng forward  | KN0693 | GCGTCGTAGTGGGTGTAGAT                              |
|                         | CNAG_01664+N<br>EO+CNAG_0166<br>4 Testng reverse  | KN0694 | CCACCCTCCGAAGAAACCGT                              |
| <i>ctk1Δ</i>            | CNAG_04118 left<br>arm forward                    | KN0695 | GCATGGTCAGATGAGGGCTAA                             |
|                         | CNAG_04118 left<br>arm reverse                    | KN0696 | TCTCCAGCTCACATCCTCGGGCGGATGTATTCCAATT<br>TTT      |
|                         | NEO for<br>CNAG_04118<br>forward                  | KN0697 | AAAATTGGAATACATCCGCCGAGGATGTGAGCTG<br>GAGA        |
|                         | NEO for<br>CNAG_04118<br>reverse                  | KN0698 | TTTTACCCTTCATTCTCCTCCTTCGGTTTATCTGTATT<br>AACACGG |
|                         | CNAG_04118<br>right arm forward                   | KN0699 | CCGTGTTAATACAGATAAACCGAAGGAGGAGAATGA<br>AGGGTAAAA |
|                         | CNAG_04118<br>right arm reverse                   | KN0700 | CAGCGTCTGTCCGTCATCACTC                            |
|                         | CNAG_04118+N<br>EO+CNAG_0411<br>8 Testing forward | KN0701 | AGTGACATCCAGGACAATCG                              |
|                         | CNAG_04118+N<br>EO+CNAG_0411<br>8 Testing reverse | KN0702 | AGGGAGGAATGTGATGTGGT                              |
| <i>ssn3Δ</i>            | CNAG_06086 left<br>arm forward                    | KN0703 | GCACTTCCATCGTGGCTATAC                             |
|                         | CNAG_06086 left<br>arm reverse                    | KN0704 | TCTCCAGCTCACATCCTCGTTTGTATTCCAGCCT<br>TATTGCC     |
|                         | NEO for<br>CNAG_06086<br>forward                  | KN0705 | GGCAATAAGGCTGGAATACAACAAACGAGGATGTGA<br>GCTGGAGA  |

|                          |                                                   |        |                                                  |
|--------------------------|---------------------------------------------------|--------|--------------------------------------------------|
|                          | NEO for<br>CNAG_06086<br>reverse                  | KN0706 | CCCATCTTAGCATCACCGTTGGTTTATCTGTATTAAC<br>ACGG    |
|                          | CNAG_06086<br>right arm forward                   | KN0707 | CCGTGTTAATACAGATAAACCAACGGTGATGCTAAGA<br>TGGG    |
|                          | CNAG_06086<br>right arm reverse                   | KN0708 | CCTTACCGACCGTTCCTTCA                             |
|                          | CNAG_06086+N<br>EO+CNAG_0608<br>6 Testing forward | KN0709 | CATTGTTCGGACTCGTCTTCA                            |
|                          | CNAG_06086+N<br>EO+CNAG_0608<br>6 Testing reverse | KN0710 | ACGATACCACCACTCCTTTG                             |
| Diploid<br><i>kin28Δ</i> | CNAG_06445 left<br>arm forward                    | KN0711 | ACCCGAGCGGATTCAAGAG                              |
|                          | CNAG_06445 left<br>arm reverse                    | KN0712 | TCTCCAGCTCACATCCTCGTGTTATACAATGTCGCGG<br>GTATCTA |
|                          | NEO for<br>CNAG_06445<br>forward                  | KN0713 | TAGATACCCGCGACATTGTATAACACGAGGATGTGA<br>GCTGGAGA |
|                          | NEO for<br>CNAG_06445<br>reverse                  | KN0714 | GCTTCCCTTGAGTTTCATCCGGTTTATCTGTATTAAC<br>ACGG    |
|                          | CNAG_064456<br>right arm forward                  | KN0715 | CCGTGTTAATACAGATAAACCGGATGAAACTCAAGG<br>GAAGC    |
|                          | CNAG_064456<br>right arm reverse                  | KN0716 | AACCATCGGTCTACCACTCC                             |
|                          | CNAG_06445+N<br>EO+CNAG_0644<br>5 Testing forward | KN0717 | TCACCCGAGCGGATTCAAGA                             |
|                          | CNAG_06445+N<br>EO+CNAG_0644<br>5 Testing reverse | KN0718 | TGCGATAGTCATAGGGTAGG                             |
| Diploid<br><i>pho85Δ</i> | CNAG_08022 left<br>arm forward                    | KN0719 | GATTATCGGGCGAGTCAGGC                             |
|                          | CNAG_08022 left<br>arm reverse                    | KN0720 | TCTCCAGCTCACATCCTCGGCCGAACGAATTAGCTC<br>CTG      |
|                          | NEO for<br>CNAG_08022<br>forward                  | KN0721 | CAGGAGCTAATTCGTTCCGGCCGAGGATGTGAGCTGG<br>AGA     |
|                          | NEO for<br>CNAG_08022<br>reverse                  | KN0722 | GCTGTCCCATCATCATCTCAGGTTTATCTGTATTAAC<br>ACGG    |
|                          | CNAG_08022<br>right arm forward                   | KN0723 | CCGTGTTAATACAGATAAACCTGAGATGATGATGGGA<br>CAGC    |
|                          | CNAG_08022<br>right arm reverse                   | KN0724 | TTGCCTACGAACGACAGAAG                             |
|                          | CNAG_08022+N<br>EO+CNAG_0802<br>2 Testing forward | KN0725 | TTATCGGGCGAGTCAGGCAG                             |
|                          | CNAG_08022+N<br>EO+CNAG_0802<br>2 Testing reverse | KN0726 | TTGCTGACCTGCGTTTGCTT                             |
| <i>cln1Δ::<br/>CLN1</i>  | CNAG_06092<br>ORF forward                         | KN0655 | GCTTTACGATTAGTTCTGGCTTCTG                        |



|                             |                                  |        |                                                     |
|-----------------------------|----------------------------------|--------|-----------------------------------------------------|
|                             | CNAG_06092<br>ORF reverse        | KN1003 | TCTCCAGCTCACATCCTCGCTGGGAATGAAGGGTAC<br>GTACAAAA    |
|                             | Neo for<br>CNAG_06092<br>forward | KN1031 | TTTTGTACGTACCCTTCATTCCCAGCGAGGATGTGAG<br>CTGGAGA    |
|                             | Neo for<br>CNAG_06092<br>reverse | KN0658 | GGAATAACCTTAGCCATCGGGAAGAGATGTAGAAAC<br>TAGCTTCCTGG |
|                             | CNAG_06092<br>right arm forward  | KN0659 | CCAGGAAGCTAGTTTCTACATCTCTTCCCGATGGCTA<br>AGGTTATTCC |
|                             | CNAG_06092<br>right arm reverse  | KN0660 | CGGGCGAAGAACGAAGAAGA                                |
| <i>clb3Δ::<br/>CLB3</i>     | CNAG_02095<br>ORF forward        | KN0591 | AATCCGTGAAGGGAATGTGG                                |
|                             | CNAG_02095<br>ORF reverse        | KN1005 | TCTCCAGCTCACATCCTCGCACCGCTTTTTATTGGTA<br>CTATGG     |
|                             | Neo for<br>CNAG_02095<br>forward | KN1036 | CCATAGTACCAATAAAAAGCGGTGCGAGGATGTGAG<br>CTGGAGA     |
|                             | Neo for<br>CNAG_02095<br>reverse | KN0594 | TACAGCCCAAGGTTAGCCCAGAAGAGATGTAGAAAC<br>TAGCTTCCTGG |
|                             | CNAG_02095<br>right arm forward  | KN0595 | CCAGGAAGCTAGTTTCTACATCTCTTCTGGGCTAACC<br>TTGGGCTGTA |
|                             | CNAG_02095<br>right arm reverse  | KN0596 | TTACCTGCGATGACCTTTGG                                |
| <i>pho80Δ::<br/>PHO80</i>   | CNAG_01922<br>ORF forward        | KN0583 | CTGGAATACTGTAGCATCACCTGTC                           |
|                             | CNAG_01922<br>ORF reverse        | KN1004 | TCTCCAGCTCACATCCTCGTCTATTCGTCCTACTACC<br>TTTGAGC    |
|                             | Neo for<br>CNAG_01922<br>forward | KN1033 | GCTCAAAGGTAGTAGGACGAATAGACGAGGATGTGA<br>GCTGGAGA    |
|                             | Neo for<br>CNAG_01922<br>reverse | KN0586 | GAATGGAGATACGGCAGGATGAAGAGATGTAGAAAC<br>TAGCTTCCTGG |
|                             | CNAG_01922<br>right arm forward  | KN0587 | CCAGGAAGCTAGTTTCTACATCTCTTCATCCTGCCGT<br>ATCTCCATTC |
|                             | CNAG_01922<br>right arm reverse  | KN0588 | AGCGCTCGCCTTGTGAACTA                                |
| <i>ssn801Δ::<br/>SSN801</i> | CNAG_00440<br>ORF forward        | KN0575 | GTAATGTATCCCTGATGCCG                                |
|                             | CNAG_00440<br>ORF reverse        | KN0794 | TCTCCAGCTCACATCCTCGCAACAAGTTCGTGCCCTA<br>CC         |
|                             | NEO for<br>CNAG_00440<br>forward | KN0795 | GGTAGGGCACGAACTTGTGCGAGGATGTGAGCTG<br>GAGA          |
|                             | NEO for<br>CNAG_00440<br>reverse | KN0578 | TGACCTATGCTATCTTGCCCGAAGAGATGTAGAACT<br>AGCTTCCTGG  |
|                             | CNAG_00440<br>right arm forward  | KN0579 | CCAGGAAGCTAGTTTCTACATCTCTTCGGGCAAGATA<br>GCATAGGTCA |
|                             | CNAG_00440<br>right arm reverse  | KN0580 | CGATGGCTTGAGGATTGGTA                                |

|                                   |                                         |        |                                                                                 |
|-----------------------------------|-----------------------------------------|--------|---------------------------------------------------------------------------------|
| <i>ssn803Δ::</i><br><i>SSN803</i> | CNAG_05901<br>ORF forward               | KN0647 | GGAGGTAACCCTTGATGTGG                                                            |
|                                   | CNAG_05901<br>ORF reverse               | KN0818 | TCTCCAGCTCACATCCTCGCAACCCTTACACCCTGAC<br>TGA                                    |
|                                   | <i>NEO</i> for<br>CNAG_05901<br>forward | KN0819 | TCAGTCAGGGTGTAAGGGTTGCGAGGATGTGAGCTG<br>GAGA                                    |
|                                   | <i>NEO</i> for<br>CNAG_05901<br>reverse | KN0650 | GGGTGTCAGAAGTCTCAGCAGAAGAGATGTAGAAAC<br>TAGCTTCCTGG                             |
|                                   | CNAG_05901<br>right arm forward         | KN0651 | CCAGGAAGCTAGTTTCTACATCTCTTCTGCTGAGACT<br>TCTGACACCC                             |
|                                   | CNAG_05901<br>right arm reverse         | KN0652 | ACTCGTCCAACAATCGCTCA                                                            |
| <i>ctk1Δ::</i><br><i>CTK1</i>     | CNAG_04118<br>ORF forward               | KN0695 | CAGATGATGGAGCGTGTTTC                                                            |
|                                   | CNAG_04118<br>ORF reverse               | KN0826 | TCTCCAGCTCACATCCTCGGAAGGGAGCCATCCTAA<br>CCAC                                    |
|                                   | <i>HYG</i> for<br>CNAG_04118<br>forward | KN0827 | GTGGTTAGGATGGCTCCCTTCCGAGGATGTGAGCTG<br>GAGA                                    |
|                                   | <i>HYG</i> for<br>CNAG_04118<br>reverse | KN0698 | AGTTCTTTGACCGATGGCGGTTTATCTGTATTAACAC<br>GG                                     |
|                                   | CNAG_04118<br>right arm forward         | KN0699 | CCGTGTTAATACAGATAAACCGCCATCGGTCAAAGAA<br>CT                                     |
|                                   | CNAG_04118<br>right arm reverse         | KN0700 | AGGGAGCCATCCTAACCA                                                              |
| <i>ssn3Δ::</i><br><i>SSN3</i>     | CNAG_06086<br>ORF forward               | KN1055 | TGCACTTCCATCGTGGCTATAC                                                          |
|                                   | CNAG_06086<br>ORF reverse               | KN1056 | TCTCCAGCTCACATCCTCGGAAGTTATCCTGTAATCC<br>TCGCG                                  |
|                                   | <i>HYG</i> for<br>CNAG_06086<br>forward | KN1057 | CGCGAGGATTACAGGATAACTTCCGAGGATGTGAGC<br>TGGAGA                                  |
|                                   | <i>HYG</i> for<br>CNAG_06086<br>reverse | KN1058 | CCCATCTTAGCATCACCGTTAACTAGCTTCCTGGTTT<br>CAGAGACA                               |
|                                   | CNAG_06086<br>right arm forward         | KN1059 | TGTCTCTGAAACCAGGAAGCTAGTTAACGGTGATGC<br>TAAGATGGG                               |
|                                   | CNAG_06086<br>right arm reverse         | KN0710 | ACGATACCACCACTCCTTTG                                                            |
| 14-3-3-<br><i>GFP</i>             | 14-3-3 ORF<br>forward                   | KN0775 | GCAGGCTGAGCGATACGAAG                                                            |
|                                   | 14-3-3 ORF<br>reverse                   | KN0776 | CTCCTCGCCCTTGCTCACAGCCGCAGGGGCAACCTC<br>GAGGTTGCCCTGCGGCTGTGAGCAAGGGCGAGGA<br>G |
|                                   | <i>GFP</i> Forward                      | KN0777 | TCTGCTACTGTAACCCCTCTAGTACAGCTCGTCCAT<br>GCCGT                                   |
|                                   | <i>GFP</i> Reverse                      | KN0752 | ACGGCATGGACGAGCTGTACTAGAGGGGTTACAGT<br>AGCAGA                                   |
|                                   | <i>GPD1</i> terminator<br>Forward       | KN0753 | TCTCCAGCTCACATCCTCGGCACAAGGGTCTCAGGG<br>ATG                                     |
|                                   | <i>GPD1</i> terminator<br>Reverse       | KN0754 |                                                                                 |

|                                                                                                                       |                                                              |        |                                                           |
|-----------------------------------------------------------------------------------------------------------------------|--------------------------------------------------------------|--------|-----------------------------------------------------------|
|                                                                                                                       | <i>NEO</i> forward                                           | KN0755 | CATCCCTGAGACCCTTGTGCCGAGGATGTGAGCTGG<br>AGA               |
|                                                                                                                       | <i>NEO</i> reverse                                           | KN0778 | GCCCCATAACACCCGAACGATAAACTAGCTTCCTGG<br>TTTCAGAGACA       |
|                                                                                                                       | 14-3-3 right arm<br>forward                                  | KN0779 | TGTCTCTGAAACCAGGAAGCTAGTTTATCGTTCGGGT<br>GTTATGGGGC       |
|                                                                                                                       | 14-3-3 right arm<br>reverse                                  | KN0780 | GCGAGCCTGAAGGAGTATTTGG                                    |
| <i>PGPD1-<br/>CLN1</i>                                                                                                | CNAG_06092<br>promoter + NAT<br>forward                      | KN0655 | GCTTTACGATTAGTTCTGGCTTCTG                                 |
|                                                                                                                       | CNAG_06092<br>promoter + NAT<br>reverse                      | KN1050 | AGATATCAGAAAGTCGCTGGAACATAACTAGCTTCCT<br>GGTTTCAGAGACA    |
|                                                                                                                       | GPD1 promoter<br>forward                                     | KN1051 | TGTCTCTGAAACCAGGAAGCTAGTTATGTTCCAGCGA<br>CTTTCTGATATCT    |
|                                                                                                                       | GPD1 promoter<br>reverse                                     | KN1052 | CTGTAGGCGCAACGGGCATTGTATTTATGCAAGTATA<br>CTCCTAG          |
|                                                                                                                       | CNAG_06092<br>ORF forward                                    | KN1053 | CTAGGAGTATACTTGCATAAATAACAATGCCCGTTGCG<br>CCTACAG         |
|                                                                                                                       | CNAG_06092<br>ORF reverse                                    | KN1041 | AATGACGATTTCTGACACTTTTCTC                                 |
| <i>PCTR4-<br/>CLN1</i>                                                                                                | CNAG_06092<br>promoter + NAT<br>forward                      | KN0655 | GCTTTACGATTAGTTCTGGCTTCTG                                 |
|                                                                                                                       | CNAG_06092<br>promoter + NAT<br>reverse                      | KN1037 | GACGTTCAATTTACCAGCAAAAATACAACACTAGCTTCCT<br>GGTTTCAGAGACA |
|                                                                                                                       | Ctr4 promoter<br>forward                                     | KN1038 | TGTCTCTGAAACCAGGAAGCTAGTTGTATTTTTGCTG<br>GTAAATGAACGTC    |
|                                                                                                                       | Ctr4 promoter<br>reverse                                     | KN1039 | CTGTAGGCGCAACGGGCATGATGGATGGTGTCTTTT<br>CGTAA             |
|                                                                                                                       | CNAG_06092<br>ORF forward                                    | KN1040 | TTACGAAAGGACACCATCCATCATGCCCGTTGCGCC<br>TACAG             |
|                                                                                                                       | CNAG_06092<br>ORF reverse                                    | KN1041 | AATGACGATTTCTGACACTTTTCTC                                 |
| CWY364<br>( <i>PGPD1-<br/>CLN1</i> ),<br>YS108<br>( <i>PGPD1-<br/>CLN1</i> ),<br>K3418F<br>( <i>PGPD1-<br/>CLN1</i> ) | <i>Saccharomyces<br/>cerevisiae</i> GPD1<br>promoter forward | KN1112 | GCGATAAGCTTAAAAGAAAGCCAAGCGTGTAGAC                        |
|                                                                                                                       | <i>Saccharomyces<br/>cerevisiae</i> GPD1<br>promoter reverse | KN1061 | CTGTAGGCGCAACGGGCATCTTTATATTATCAATATT<br>TGTGTTTGTGG      |
|                                                                                                                       | CNAG_06092<br>ORF forward                                    | KN1062 | CCACAAACACAAATATTGATAATATAAAGATGCCCGT<br>TGCGCCTACAG      |
|                                                                                                                       | CNAG_06092<br>ORF reverse                                    | KN1063 | TACGCGCACAAAAGCAGAGACTAATTGCTTAGCCGT<br>CTCATAAC          |
|                                                                                                                       | <i>Saccharomyces<br/>cerevisiae</i><br>terminator forward    | KN1064 | GTTATGAGACGGCTAAGCAATTAGTCTCTGCTTTTGT<br>GCGCGTA          |
|                                                                                                                       | <i>Saccharomyces<br/>cerevisiae</i><br>terminator reverse    | KN1113 | CACGTTCTAGAAACTGAAAAGCGATGAAGAGATGAT                      |
| <i>CDK1-Myc</i>                                                                                                       | CNAG_01664<br>ORF forward                                    | KN1078 | TGCCAAGCACTTCGATCAGAG                                     |

|                             |                                                     |        |                                                                  |
|-----------------------------|-----------------------------------------------------|--------|------------------------------------------------------------------|
|                             | CNAG_01664<br>ORF-Myc reverse                       | KN1171 | CAGATCCTCTTCTGAGATGAGTTTTTGTCTGCGGCG<br>GCGAGGTTGACAGTG          |
|                             | <i>GPD1</i> terminator<br>forward                   | KN1172 | GAACAAAACTCATCTCAGAAGAGGATCTGTAGAGG<br>GGTTACAGTAGCAGA           |
|                             | <i>GPD1</i> terminator<br>reverse                   | KN0760 | TCTCCAGCTCACATCCTCGGCACAAGGGTCTCAGGG<br>ATG                      |
|                             | <i>NAT</i> for<br>CNAG_01664-<br>Myc forward        | KN0761 | CATCCCTGAGACCCTTGTGCCGAGGATGTGAGCTGG<br>AGA                      |
|                             | <i>NAT</i> for<br>CNAG_01664-<br>Myc reverse        | KN1081 | GGGGAAGTAAATTGTTCTAGGCTTTAACTAGCTTCT<br>GGTTTCAGAGACA            |
|                             | CNAG_01664<br>right arm forward                     | KN1082 | TGTCTCTGAAACCAGGAAGCTAGTTAAAGCCTAGAAC<br>AATTTACTTCCCC           |
|                             | CNAG_01664<br>right arm reverse                     | KN1083 | ATTTATCTTTTCCTCACATCGCC                                          |
| <i>CLN1-His<sub>6</sub></i> | CNAG_06092<br>ORF forward                           | KN1047 | CCGATTACGACCAGAGGTACTIONTTA                                      |
|                             | CNAG_06092<br>ORF- <i>His<sub>6</sub></i> reverse   | KN1048 | CTGCTACTGTAACCCCTCTAGTGGTGATGGTGATG<br>ATGATTGCTTAGCCGTCTCATAAC  |
|                             | <i>GPD1</i> terminator<br>forward                   | KN1049 | GTTATGAGACGGCTAAGCAATCATCATCACCATCACC<br>ACTAGAGGGGGTTACAGTAGCAG |
|                             | <i>GPD1</i> terminator<br>reverse                   | KN0754 | TCTCCAGCTCACATCCTCGGCACAAGGGTCTCAGGG<br>ATG                      |
|                             | <i>NEO</i> for<br>CNAG_06092- <i>His</i><br>forward | KN0755 | CATCCCTGAGACCCTTGTGCCGAGGATGTGAGCTGG<br>AGA                      |
|                             | <i>NEO</i> for<br>CNAG_06092- <i>His</i><br>reverse | KN0658 | GGAATAACCTTAGCCATCGGGAAGAGATGTAGAAAC<br>TAGCTTCTGG               |
|                             | CNAG_06092<br>right arm forward                     | KN0659 | CCAGGAAGCTAGTTTCTACATCTTCCCGATGGCTA<br>AGGTTATTCC                |
|                             | CNAG_06092<br>right arm reverse                     | KN0660 | CGGGCGAAGAACGAAGAAGA                                             |
